# Supplementary material
Source: publisher figshare collection journal article supplement (https://acs.figshare.com/ndownloader/files/25808201)
Supplement: Supplementary file 1 [file 25808201]

## Sheet: Table S1
Supplemental Table S1: Essential Genes in E. coli and there Number of promoters
Number	Essential Gene	Number of Annotate or Predicted Promoters
1	ribF	1
2	folA	1
3	secA	1
4	map	1
5	rpsB	1
6	pyrH	1
7	tilS	1
8	proS	1
9	ribD	1
10	dxs	1
11	ispA	1
12	dnaX	1
13	adk	1
14	hemH	1
15	lpxH	1
16	cysS	1
17	mrdB	1
18	mrdA	1
19	holA	1
20	lptE	1
21	leuS	1
22	cydD	1
23	serS	1
24	mukF	1
25	mukE	1
26	mukB	1
27	asnS	1
28	fabA	1
29	murJ	1
30	pth	1
31	ispE	1
32	lolB	1
33	ymiB	1
34	fabI	1
35	ttcC	1
36	ynbG	1
37	safA	1
38	ribC	1
39	thrS	1
40	nadE	1
41	tsaB	1
42	argS	1
43	folE	1
44	gyrA	1
45	nrdA	1
46	nrdB	1
47	folC	1
48	fabB	1
49	zipA	1
50	dapA	1
51	hisS	1
52	suhB	1
53	tadA	1
54	era	1
55	rplS	1
56	trmD	1
57	rimM	1
58	rpsP	1
59	ffh	1
60	grpE	1
61	nadK	1
62	alaS	1
63	ispD	1
64	ftsB	1
65	lgt	1
66	yqgF	1
67	rplU	1
68	rplM	1
69	def	1
70	fmt	1
71	secY	1
72	rplO	1
73	rpmD	1
74	rpsE	1
75	rplR	1
76	rplF	1
77	rpsH	1
78	rpsN	1
79	rplE	1
80	rplX	1
81	rplN	1
82	rpmC	1
83	rplP	1
84	rpsS	1
85	rplB	1
86	rplW	1
87	rplD	1
88	rplC	1
89	rpsJ	1
90	rpsL	1
91	ftsY	1
92	glyQ	1
93	rpmB	1
94	dfp	1
95	gmk	1
96	rho	1
97	wzyE	1
98	hemG	1
99	yihA	1
100	murI	1
101	birA	1
102	coaA	1
103	rplK	1
104	rplA	1
105	ubiA	1
106	lexA	1
107	dnaB	1
108	psd	1
109	orn	1
110	priB	1
111	ppa	1
112	dapB	2
113	can	2
114	bamA	2
115	ribE	2
116	thiL	2
117	infA	2
118	cydC	2
119	lolC	2
120	lolD	2
121	lolE	2
122	prs	2
123	hemA	2
124	prfA	2
125	ribA	2
126	dicA	2
127	tyrS	2
128	aspS	2
129	metG	2
130	ligA	2
131	dapE	2
132	lepB	2
133	pssA	2
134	ispF	2
135	yqcG	2
136	metK	2
137	cca	2
138	tsaD	2
139	obgE	2
140	rpmA	2
141	accB	2
142	accC	2
143	rplQ	2
144	rpoA	2
145	rpsD	2
146	rpsK	2
147	rpsM	2
148	fusA	2
149	glyS	2
150	waaA	2
151	coaD	2
152	dut	2
153	gyrB	2
154	dnaA	2
155	glmU	2
156	ubiB	2
157	rplJ	2
158	hemE	2
159	plsB	2
160	groS	2
161	rpsR	2
162	lptF	2
163	lptG	2
164	lptD	3
165	hemL	3
166	frr	3
167	glnS	3
168	msbA	3
169	lpxK	3
170	prmC	3
171	racR	3
172	ispG	3
173	acpS	3
174	pyrG	3
175	rpsU	3
176	dnaG	3
177	rpoD	3
178	rpmH	3
179	rnpA	3
180	glmS	3
181	rplL	3
182	ssb	3
183	tsaE	3
184	valS	3
185	dnaC	3
186	dnaT	3
187	ileS	4
188	ftsL	4
189	ftsI	4
190	murE	4
191	murF	4
192	mraY	4
193	murD	4
194	ftsW	4
195	murG	4
196	murC	4
197	dxr	4
198	gltX	4
199	der	4
200	fbaA	4
201	pgk	4
202	rpoB	4
203	rpoC	4
204	groL	4
205	lspA	5
206	ispH	5
207	topA	6
208	lpxC	>2
209	dapD	>2
210	accA	>2
211	hemB	>2
212	pheT	>2
213	ftsQ	>3
214	ftsA	>3
215	ispU	>3
216	ycaR	>3
217	kdsB	>3
218	acpP	>3
219	tmk	>3
220	holB	>3
221	pheS	>3
222	pheM	>3
223	rplT	>3
224	rpmI	>3
225	infC	>3
226	lptA	>3
227	lptB	>3
228	ftsZ	>4
229	cdsA	>4
230	lpxD	>4
231	fabZ	>4
232	lpxA	>4
233	lpxB	>4
234	dnaE	>4
235	cydA	>4
236	cydB	>4
237	fabD	>4
238	fabG	>4
239	prfB	>4
240	infB	>4
241	nusA	>4
242	rpoE	>5
243	csrA	>6
244	gapA	>7
245	rpoH	>7
246	eno	>8
247	tsf	TBD
248	trpS	many
249	dnaN	many
250	coaE	TBD
251	yqeL	TBD
252	plsC	TBD
253	parC	TBD
254	parE	TBD
255	ispB	TBD
256	asd	TBD
257	yidC	TBD
258	hemD	TBD
259	hemC	TBD
260	yjbS	TBD
261	cydX	many

## Sheet: Table S2
Supplemental Table S2: gRNA Sequences and Oligos used in pCASCADE Construction
sgRNA/Primer Name	Sequence	Template
gltA1	TCGAGTTCCCCGCGCCAGCGGGGATAAACCGAAAAGCATATAATGCGTAAAAGTTATGAAGTTCGAGTTCCCCGCGCCAGCGGGGATAAACCG
gltA1-FOR	GCGTAAAAGTTATGAAGTTCGAGTTCCCCGCGCCAGCGGGGATAAACCGAAAAAAAAACCCC	pCASCADE control
gltA1-REV	ATTATATGCTTTTCGGTTTATCCCCGCTGGCGCGGGGAACTCGAGGTGGTACCAGATCT
G1Z	TCGAGTTCCCCGCGCCAGCGGGGATAAACCGAAAAGCATATAATGCGTAAAAGTTATGAAGTTCGAGTTCCCCGCGCCAGCGGGGATAAACCGCTCGTAAAAGCAGTACAGTGCACCGTAAGATCGAGTTCCCCGCGCCAGCGGGGATAAACCG
zwf-FOR	GCGCCAGCGGGGATAAACCGCTCGTAAAAG	pCASCADE-zwf
pCASCADE-REV	CTTGCCCGCCTGATGAATGCTCATCCGG
pCASCADE-FOR	CCGGATGAGCATTCATCAGGCGGGCAAG	pCASCADE-gltA1
gltA1-REV	CGGTTTATCCCCGCTGGCGCGGGGAACTCGAACTTCATAACTTTTAC
pCASCADE-REV	CTTGCCCGCCTGATGAATGCTCATCCGG
pCASCADE-FOR	CCGGATGAGCATTCATCAGGCGGGCAAG	pCASCADE-fabI
fabI-REV	CGGTTTATCCCCGCTGGCGCGGGGAACTCGATACGAACAGATAAACGGTTATTATAATC
FG1G2	TCGAGTTCCCCGCGCCAGCGGGGATAAACCGTTGATTATAATAACCGTTTATCTGTTCGTATCGAGTTCCCCGCGCCAGCGGGGATAAACCGAAAAGCATATAATGCGTAAAAGTTATGAAGTTCGAGTTCCCCGCGCCAGCGGGGATAAACCGTATTGACCAATTCATTCGGGACAGTTATTAGTTCGAGTTCCCCGCGCCAGCGGGGATAAACCG
gltA2-FOR	GCGCCAGCGGGGATAAACCGTATTGACCAATTCATTC	pCASCADE-gltA2
pCASCADE-REV	CTTGCCCGCCTGATGAATGCTCATCCGG
pCASCADE-FOR	CCGGATGAGCATTCATCAGGCGGGCAAG	pCASCADE-FG1
gltA1-REV	CGGTTTATCCCCGCTGGCGCGGGGAACTCGAACTTCATAACTTTTAC
FG1G2U	TCGAGTTCCCCGCGCCAGCGGGGATAAACCGTTGATTATAATAACCGTTTATCTGTTCGTATCGAGTTCCCCGCGCCAGCGGGGATAAACCGAAAAGCATATAATGCGTAAAAGTTATGAAGTTCGAGTTCCCCGCGCCAGCGGGGATAAACCGTATTGACCAATTCATTCGGGACAGTTATTAGTTCGAGTTCCCCGCGCCAGCGGGGATAAACCGTTACCATTCTGTTGCTTTTATGTATAAGAATCGAGTTCCCCGCGCCAGCGGGGATAAACCG
gltA2-FOR	GCGCCAGCGGGGATAAACCGTATTGACCAATTCATTC	pCASCADE-udhA
pCASCADE-REV	CTTGCCCGCCTGATGAATGCTCATCCGG
pCASCADE-FOR	CCGGATGAGCATTCATCAGGCGGGCAAG	pCASCADE-FG1G2
gltA1-REV	CGGTTTATCCCCGCTGGCGCGGGGAACTCGAACTTCATAACTTTTAC
FG1G2Z	TCGAGTTCCCCGCGCCAGCGGGGATAAACCGTTGATTATAATAACCGTTTATCTGTTCGTATCGAGTTCCCCGCGCCAGCGGGGATAAACCGAAAAGCATATAATGCGTAAAAGTTATGAAGTTCGAGTTCCCCGCGCCAGCGGGGATAAACCGTATTGACCAATTCATTCGGGACAGTTATTAGTTCGAGTTCCCCGCGCCAGCGGGGATAAACCGCTCGTAAAAGCAGTACAGTGCACCGTAAGATCGAGTTCCCCGCGCCAGCGGGGATAAACCG
gltA2-FOR	GCGCCAGCGGGGATAAACCGTATTGACCAATTCATTC	pCASCADE-zwf
pCASCADE-REV	CTTGCCCGCCTGATGAATGCTCATCCGG
pCASCADE-FOR	CCGGATGAGCATTCATCAGGCGGGCAAG	pCASCADE-FG1G2
gltA1-REV	CGGTTTATCCCCGCTGGCGCGGGGAACTCGAACTTCATAACTTTTAC
FG1G2UZ	TCGAGTTCCCCGCGCCAGCGGGGATAAACCGTTGATTATAATAACCGTTTATCTGTTCGTATCGAGTTCCCCGCGCCAGCGGGGATAAACCGAAAAGCATATAATGCGTAAAAGTTATGAAGTTCGAGTTCCCCGCGCCAGCGGGGATAAACCGTATTGACCAATTCATTCGGGACAGTTATTAGTTCGAGTTCCCCGCGCCAGCGGGGATAAACCGTTACCATTCTGTTGCTTTTATGTATAAGAATCGAGTTCCCCGCGCCAGCGGGGATAAACCGCTCGTAAAAGCAGTACAGTGCACCGTAAGATCGAGTTCCCCGCGCCAGCGGGGATAAACCG
zwf-FOR	GCGCCAGCGGGGATAAACCGCTCGTAAAAG	pCASCADE-zwf
pCASCADE-REV	CTTGCCCGCCTGATGAATGCTCATCCGG
pCASCADE-FOR	CCGGATGAGCATTCATCAGGCGGGCAAG	pCASCADE-FG1G2U
udhA-REV	CGGTTTATCCCCGCTGGCGCGGGGAACTCGATTCTTATACATAAAAGC
UZ	TCGAGTTCCCCGCGCCAGCGGGGATAAACCGTTACCATTCTGTTGCTTTTATGTATAAGAATCGAGTTCCCCGCGCCAGCGGGGATAAACCGCTCGTAAAAGCAGTACAGTGCACCGTAAGATCGAGTTCCCCGCGCCAGCGGGGATAAACCG
zwf-FOR	GCGCCAGCGGGGATAAACCGCTCGTAAAAG	pCASCADE-zwf
pCASCADE-REV	CTTGCCCGCCTGATGAATGCTCATCCGG
pCASCADE-FOR	CCGGATGAGCATTCATCAGGCGGGCAAG	pCASCADE-udhA
udhA-REV	CGGTTTATCCCCGCTGGCGCGGGGAACTCGATTCTTATACATAAAAGC
proD-2	TCGAGTTCCCCGCGCCAGCGGGGATAAACCGgctcgtataatatattcagggagaccacaaTCGAGTTCCCCGCGCCAGCGGGGATAAACCG
	tcagggagaccacaaTCGAGTTCCCCGCGCCAGCGGGGATAAACCGAAAAAAAAACCCC	pCASCADE control
	atatattatacgagcCGGTTTATCCCCGCTGGCGCGGGGAACTCGAGGTGGTACCAGATC
dfp-1	TCGAGTTCCCCGCGCCAGCGGGGATAAACCGTGAATCTCAGGTGAAGGCACGACAACAAAATCGAGTTCCCCGCGCCAGCGGGGATAAACCG
dfp-1-gRNA-FOR	GGCACGACAACAAAATCGAGTTCCCCGCGCCAGCGGGGATAAACCGAAAAAAAAACCCC	pCASCADE control
dfp-1-gRNA-REV	TTCACCTGAGATTCACGGTTTATCCCCGCTGGCGCGGGGAACTCGAGGTGGTACCAGATC
dfp-2	TCGAGTTCCCCGCGCCAGCGGGGATAAACCGTGAAGGCACGACAACAAAAGTATTGTGATATCGAGTTCCCCGCGCCAGCGGGGATAAACCG
dfp-2-gRNA-FOR	AAAAGTATTGTGATATCGAGTTCCCCGCGCCAGCGGGGATAAACCGAAAAAAAAACCCC	pCASCADE control
dfp-2-gRNA-REV	GTTGTCGTGCCTTCACGGTTTATCCCCGCTGGCGCGGGGAACTCGAGGTGGTACCAGATC
dfp-3	TCGAGTTCCCCGCGCCAGCGGGGATAAACCGCACGACAACAAAAGTATTGTGATAAAATCGTCGAGTTCCCCGCGCCAGCGGGGATAAACCG
dfp-3-gRNA-FOR	ATTGTGATAAAATCGTCGAGTTCCCCGCGCCAGCGGGGATAAACCGAAAAAAAAACCCC	pCASCADE control
dfp-3-gRNA-REV	ACTTTTGTTGTCGTGCGGTTTATCCCCGCTGGCGCGGGGAACTCGAGGTGGTACCAGATC
cysS-1	TCGAGTTCCCCGCGCCAGCGGGGATAAACCGCTGATTCGCGCGGGAAATATGGGTATTATATCGAGTTCCCCGCGCCAGCGGGGATAAACCG
cysS-1-gRNA-FOR	AATATGGGTATTATATCGAGTTCCCCGCGCCAGCGGGGATAAACCGAAAAAAAAACCCC	pCASCADE control
cysS-1-gRNA-REV	TCCCGCGCGAATCAGCGGTTTATCCCCGCTGGCGCGGGGAACTCGAGGTGGTACCAGATC
cysS-2	TCGAGTTCCCCGCGCCAGCGGGGATAAACCGGGTATTATACGCAACTCAATTACCCACACATCGAGTTCCCCGCGCCAGCGGGGATAAACCG
cysS-2-gRNA-FOR	TCAATTACCCACACATCGAGTTCCCCGCGCCAGCGGGGATAAACCGAAAAAAAAACCCC	pCASCADE control
cysS-2-gRNA-REV	GTTGCGTATAATACCCGGTTTATCCCCGCTGGCGCGGGGAACTCGAGGTGGTACCAGATC
cysS-3	TCGAGTTCCCCGCGCCAGCGGGGATAAACCGTCTAAACGGAATCTTCGatgCTAAAAATCTTCGAGTTCCCCGCGCCAGCGGGGATAAACCG
cysS-3-gRNA-FOR	CGatgCTAAAAATCTTCGAGTTCCCCGCGCCAGCGGGGATAAACCGAAAAAAAAACCCC	pCASCADE control
cysS-3-gRNA-REV	AAGATTCCGTTTAGACGGTTTATCCCCGCTGGCGCGGGGAACTCGAGGTGGTACCAGATC
nadE	TCGAGTTCCCCGCGCCAGCGGGGATAAACCGCCTGGAATACATTGGGCGCTTTTTCAAGCCTCGAGTTCCCCGCGCCAGCGGGGATAAACCG
nadE-gRNA-FOR	GCGCTTTTTCAAGCCTCGAGTTCCCCGCGCCAGCGGGGATAAACCGAAAAAAAAACCCC	pCASCADE control
nadE-gRNA-REV	CCAATGTATTCCAGGCGGTTTATCCCCGCTGGCGCGGGGAACTCGAGGTGGTACCAGATC
adk	TCGAGTTCCCCGCGCCAGCGGGGATAAACCGTGCCTTTCTTGAGGCAATCGCCTGTTGGTGTCGAGTTCCCCGCGCCAGCGGGGATAAACCG
adk-gRNA-FOR	AATCGCCTGTTGGTGTCGAGTTCCCCGCGCCAGCGGGGATAAACCGAAAAAAAAACCCC	pCASCADE control
adk-gRNA-REV	GCCTCAAGAAAGGCACGGTTTATCCCCGCTGGCGCGGGGAACTCGAGGTGGTACCAGATC
dxs-1	TCGAGTTCCCCGCGCCAGCGGGGATAAACCGTCCGTTACCATGACGGGGCGAAAAATATTGTCGAGTTCCCCGCGCCAGCGGGGATAAACCG
dxs-1-gRNA-FOR	GGGCGAAAAATATTGTCGAGTTCCCCGCGCCAGCGGGGATAAACCGAAAAAAAAACCCC	pCASCADE control
dxs-1-gRNA-REV	CGTCATGGTAACGGACGGTTTATCCCCGCTGGCGCGGGGAACTCGAGGTGGTACCAGATC
dxs-2	TCGAGTTCCCCGCGCCAGCGGGGATAAACCGACGGGGCGAAAAATATTGAGAGTCAGACATTCGAGTTCCCCGCGCCAGCGGGGATAAACCG
dxs-2-gRNA-FOR	TTGAGAGTCAGACATTCGAGTTCCCCGCGCCAGCGGGGATAAACCGAAAAAAAAACCCC	pCASCADE control
dxs-2-gRNA-REV	TATTTTTCGCCCCGTCGGTTTATCCCCGCTGGCGCGGGGAACTCGAGGTGGTACCAGATC
gyrA-1	TCGAGTTCCCCGCGCCAGCGGGGATAAACCGCGTATAGGTTTACCTCAAACTGCGCGGCTGTCGAGTTCCCCGCGCCAGCGGGGATAAACCG
gyrA-1-gRNA-FOR	CAAACTGCGCGGCTGTCGAGTTCCCCGCGCCAGCGGGGATAAACCGAAAAAAAAACCCC	pCASCADE control
gyrA-1-gRNA-REV	AGGTAAACCTATACGCGGTTTATCCCCGCTGGCGCGGGGAACTCGAGGTGGTACCAGATC
gyrA-2	TCGAGTTCCCCGCGCCAGCGGGGATAAACCGTTTACCTCAAACTGCGCGGCTGTGTTATAATCGAGTTCCCCGCGCCAGCGGGGATAAACCG
gyrA-2-gRNA-FOR	GCGGCTGTGTTATAATCGAGTTCCCCGCGCCAGCGGGGATAAACCGAAAAAAAAACCCC	pCASCADE control
gyrA-2-gRNA-REV	GCAGTTTGAGGTAAACGGTTTATCCCCGCTGGCGCGGGGAACTCGAGGTGGTACCAGATC
b1	TCGAGTTCCCCGCGCCAGCGGGGATAAACCGTCGCCTGTCTTTTGATCTGCTAAACGTA ACTCGAGTTCCCCGCGCCAGCGGGGATAAACCG
b1-gRNA-FOR	TCTGCTAAACGTA ACTCGAGTTCCCCGCGCCAGCGGGGATAAACCGAAAAAAAAACCCC	pCASCADE control
b1-gRNA-REV	TCAAAAGACAGGCGACGGTTTATCCCCGCTGGCGCGGGGAACTCGAGGTGGTACCAGATC
b2	TCGAGTTCCCCGCGCCAGCGGGGATAAACCGCAGTTTA TAAAATTCTGTCCGGTTGCGCCCTCGAGTTCCCCGCGCCAGCGGGGATAAACCG
b2-gRNA-FOR	GGTTGCGCCCTCGAGTTCCCCGCGCCAGCGGGGATAAACCGAAAAAAAAACC	pCASCADE control
b2-gRNA-REV	GGACAGAATTTTATAAACTGCGGTTTATCCCCGCTGGCGCGGGGAACTCGAGGTGGTACC
gapA	TCGAGTTCCCCGCGCCAGCGGGGATAAACCGGTTTTTGTAATTT TACAGGCAACCTTTTATTCGAGTTCCCCGCGCCAGCGGGGATAAACCG
gapA-gRNA-FOR	CAGGCAACCTTTTATTCGAGTTCCCCGCGCCAGCGGGGATAAACCGAAAAAAAAACCCC	pCASCADE control
gapA-gRNA-REV	TAAAATTACAAAAACCGGTTTATCCCCGCTGGCGCGGGGAACTCGAGGTGGTACCAGATC
b1b2	TCGAGTTCCCCGCGCCAGCGGGGATAAACCGTCGCCTGTCTTTTGATCTGCTAAACGTA ACTCGAGTTCCCCGCGCCAGCGGGGATAAACCGCAGTTTA TAAAATTCTGTCCGGTTGCGCCCTCGAGTTCCCCGCGCCAGCGGGGATAAACCG
b2-FOR	GCGCCAGCGGGGATAAACCGCAGTTTA TAAAATTCTGTCCGG	pCASCADE-b1
pCASCADE-REV	CTTGCCCGCCTGATGAATGCTCATCCGG
pCASCADE-FOR	CCGGATGAGCATTCATCAGGCGGGCAAG	pCASCADE-b2
b1-REV	TTTATCCCCGCTGGCGCGGGGAACTCGAGTTACGTTTAGCAGATC
fg1g2ua	TCGAGTTCCCCGCGCCAGCGGGGATAAACCGTTGATTATAATAACCGTTTATCTGTTCGTATCGAGTTCCCCGCGCCAGCGGGGATAAACCGAAAAGCATATAATGCGTAAAAGTTATGAAGTTCGAGTTCCCCGCGCCAGCGGGGATAAACCGTATTGACCAATTCATTCGGGACAGTTATTAGTTCGAGTTCCCCGCGCCAGCGGGGATAAACCGTTACCATTCTGTTGCTTTTATGTATAAGAATCGAGTTCCCCGCGCCAGCGGGGATAAACCGGTTTTTGTAATTT TACAGGCAACCTTTTATTCGAGTTCCCCGCGCCAGCGGGGATAAACCG
gapA1-FOR	GCGCCAGCGGGGATAAACCGGTTTTTGTAATTT TACAGGC	pCASCADE-gapA
pCASCADE-REV	CTTGCCCGCCTGATGAATGCTCATCCGG
pCASCADE-FOR	CCGGATGAGCATTCATCAGGCGGGCAAG	pCASCADE-fg1g2u
udhA-REV	CGGTTTATCCCCGCTGGCGCGGGGAACTCGATTCTTATACATAAAAGC
fg1g2uza	TCGAGTTCCCCGCGCCAGCGGGGATAAACCGTTGATTATAATAACCGTTTATCTGTTCGTATCGAGTTCCCCGCGCCAGCGGGGATAAACCGAAAAGCATATAATGCGTAAAAGTTATGAAGTTCGAGTTCCCCGCGCCAGCGGGGATAAACCGTATTGACCAATTCATTCGGGACAGTTATTAGTTCGAGTTCCCCGCGCCAGCGGGGATAAACCGTTACCATTCTGTTGCTTTTATGTATAAGAATCGAGTTCCCCGCGCCAGCGGGGATAAACCGCTCGTAAAAGCAGTACAGTGCACCGTAAGATCGAGTTCCCCGCGCCAGCGGGGATAAACCGGTTTTTGTAATTT TACAGGCAACCTTTTATTCGAGTTCCCCGCGCCAGCGGGGATAAAC…
gapA1-FOR	GCGCCAGCGGGGATAAACCGGTTTTTGTAATTT TACAGGC	pCASCADE-gapA
pCASCADE-REV	CTTGCCCGCCTGATGAATGCTCATCCGG
pCASCADE-FOR	CCGGATGAGCATTCATCAGGCGGGCAAG	pCASCADE-fg1g2uz
zwf-REV	CGGTTTATCCCCGCTGGCGCGGGGAACTCGATCTTACGGTGCACTGTAC
g1zb1b2	TCGAGTTCCCCGCGCCAGCGGGGATAAACCGAAAAGCATATAATGCGTAAAAGTTATGAAGTTCGAGTTCCCCGCGCCAGCGGGGATAAACCGCTCGTAAAAGCAGTACAGTGCACCGTAAGATCGAGTTCCCCGCGCCAGCGGGGATAAACCGTCGCCTGTCTTTTGATCTGCTAAACGTA ACTCGAGTTCCCCGCGCCAGCGGGGATAAACCGCAGTTTA TAAAATTCTGTCCGGTTGCGCCCTCGAGTTCCCCGCGCCAGCGGGGATAAACCG
b1-FOR	GCCAGCGGGGATAAACCGTCGCCTGTCTTTTGATC	pCASCADE-b1b2
pCASCADE-REV	CTTGCCCGCCTGATGAATGCTCATCCGG
pCASCADE-FOR	CCGGATGAGCATTCATCAGGCGGGCAAG	pCASCADE-g1z
zwf-REV	CGGTTTATCCCCGCTGGCGCGGGGAACTCGATCTTACGGTGCACTGTAC
g2b1b2	TCGAGTTCCCCGCGCCAGCGGGGATAAACCGTATTGACCAATTCATTCGGGACAGTTATTAGTTCGAGTTCCCCGCGCCAGCGGGGATAAACCGTCGCCTGTCTTTTGATCTGCTAAACGTAACTCGAGTTCCCCGCGCCAGCGGGGATAAACCGCAGTTTATAAAATTCTGTCCGGTTGCGCCCTCGAGTTCCCCGCGCCAGCGGGGATAAACCG
b1-FOR	GCCAGCGGGGATAAACCGTCGCCTGTCTTTTGATC	pCASCADE-b1b2
pCASCADE-REV	CTTGCCCGCCTGATGAATGCTCATCCGG
pCASCADE-FOR	CCGGATGAGCATTCATCAGGCGGGCAAG	pCASCADE-g2
g2-REV	CGGTTTATCCCCGCTGGCGCGGGGAACTCGAACTAATAACTGTC
g2ub1	TCGAGTTCCCCGCGCCAGCGGGGATAAACCGTATTGACCAATTCATTCGGGACAGTTATTAGTTCGAGTTCCCCGCGCCAGCGGGGATAAACCGTTACCATTCTGTTGCTTTTATGTATAAGAATCGAGTTCCCCGCGCCAGCGGGGATAAACCGTCGCCTGTCTTTTGATCTGCTAAACGTA ACTCGAGTTCCCCGCGCCAGCGGGGATAAACCG
b1-FOR	GCCAGCGGGGATAAACCGTCGCCTGTCTTTTGATC	pCASCADE-b1
pCASCADE-REV	CTTGCCCGCCTGATGAATGCTCATCCGG
pCASCADE-FOR	CCGGATGAGCATTCATCAGGCGGGCAAG	pCASCADE-g2u
udhA-REV	CGGTTTATCCCCGCTGGCGCGGGGAACTCGATTCTTATACATAAAAGC
g2ub1b2	TCGAGTTCCCCGCGCCAGCGGGGATAAACCGTATTGACCAATTCATTCGGGACAGTTATTAGTTCGAGTTCCCCGCGCCAGCGGGGATAAACCGTTACCATTCTGTTGCTTTTATGTATAAGAATCGAGTTCCCCGCGCCAGCGGGGATAAACCGTCGCCTGTCTTTTGATCTGCTAAACGTA ACTCGAGTTCCCCGCGCCAGCGGGGATAAACCGCAGTTTA TAAAATTCTGTCCGGTTGCGCCCTCGAGTTCCCCGCGCCAGCGGGGATAAACCG
b1-FOR	GCCAGCGGGGATAAACCGTCGCCTGTCTTTTGATC	pCASCADE-b1b2
pCASCADE-REV	CTTGCCCGCCTGATGAATGCTCATCCGG
pCASCADE-FOR	CCGGATGAGCATTCATCAGGCGGGCAAG	pCASCADE-g2u
udhA-REV	CGGTTTATCCCCGCTGGCGCGGGGAACTCGATTCTTATACATAAAAGC
g2zb1b2	TCGAGTTCCCCGCGCCAGCGGGGATAAACCGTATTGACCAATTCATTCGGGACAGTTATTAGTTCGAGTTCCCCGCGCCAGCGGGGATAAACCGCTCGTAAAAGCAGTACAGTGCACCGTAAGATCGAGTTCCCCGCGCCAGCGGGGATAAACCGTCGCCTGTCTTTTGATCTGCTAAACGTA ACTCGAGTTCCCCGCGCCAGCGGGGATAAACCGCAGTTTA TAAAATTCTGTCCGGTTGCGCCCTCGAGTTCCCCGCGCCAGCGGGGATAAACCG
b1-FOR	GCCAGCGGGGATAAACCGTCGCCTGTCTTTTGATC	pCASCADE-b1b2
pCASCADE-REV	CTTGCCCGCCTGATGAATGCTCATCCGG
pCASCADE-FOR	CCGGATGAGCATTCATCAGGCGGGCAAG	pCASCADE-g2z
zwf-REV	CGGTTTATCCCCGCTGGCGCGGGGAACTCGATCTTACGGTGCACTGTAC
g1b1	TCGAGTTCCCCGCGCCAGCGGGGATAAACCGAAAAGCATATAATGCGTAAAAGTTATGAAGTTCGAGTTCCCCGCGCCAGCGGGGATAAACCGTCGCCTGTCTTTTGATCTGCTAAACGTA ACTCGAGTTCCCCGCGCCAGCGGGGATAAACCG
b1-FOR	GCCAGCGGGGATAAACCGTCGCCTGTCTTTTGATC	pCASCADE-b1
pCASCADE-REV	CTTGCCCGCCTGATGAATGCTCATCCGG
pCASCADE-FOR	CCGGATGAGCATTCATCAGGCGGGCAAG	pCASCADE-g1
g1-REV	CGGTTTATCCCCGCTGGCGCGGGGAACTCGAACTTCATAACTTTTAC
g2b1	TCGAGTTCCCCGCGCCAGCGGGGATAAACCGTATTGACCAATTCATTCGGGACAGTTATTAGTTCGAGTTCCCCGCGCCAGCGGGGATAAACCGTCGCCTGTCTTTTGATCTGCTAAACGTA ACTCGAGTTCCCCGCGCCAGCGGGGATAAACCG
b1-FOR	GCCAGCGGGGATAAACCGTCGCCTGTCTTTTGATC	pCASCADE-b1
pCASCADE-REV	CTTGCCCGCCTGATGAATGCTCATCCGG
pCASCADE-FOR	CCGGATGAGCATTCATCAGGCGGGCAAG	pCASCADE-g2
g2-REV	CGGTTTATCCCCGCTGGCGCGGGGAACTCGAACTAATAACTGTC
ub1	TCGAGTTCCCCGCGCCAGCGGGGATAAACCGTTACCATTCTGTTGCTTTTATGTATAAGAATCGAGTTCCCCGCGCCAGCGGGGATAAACCGTCGCCTGTCTTTTGATCTGCTAAACGTA ACTCGAGTTCCCCGCGCCAGCGGGGATAAACCG
b1-FOR	GCCAGCGGGGATAAACCGTCGCCTGTCTTTTGATC	pCASCADE-b1
pCASCADE-REV	CTTGCCCGCCTGATGAATGCTCATCCGG
pCASCADE-FOR	CCGGATGAGCATTCATCAGGCGGGCAAG	pCASCADE-u
udhA-REV	CGGTTTATCCCCGCTGGCGCGGGGAACTCGATTCTTATACATAAAAGC
ub1b2	TCGAGTTCCCCGCGCCAGCGGGGATAAACCGTTACCATTCTGTTGCTTTTATGTATAAGAATCGAGTTCCCCGCGCCAGCGGGGATAAACCGTCGCCTGTCTTTTGATCTGCTAAACGTA ACTCGAGTTCCCCGCGCCAGCGGGGATAAACCGCAGTTTA TAAAATTCTGTCCGGTTGCGCCCTCGAGTTCCCCGCGCCAGCGGGGATAAACCG
b1-FOR	GCCAGCGGGGATAAACCGTCGCCTGTCTTTTGATC	pCASCADE-b1b2
pCASCADE-REV	CTTGCCCGCCTGATGAATGCTCATCCGG
pCASCADE-FOR	CCGGATGAGCATTCATCAGGCGGGCAAG	pCASCADE-u
udhA-REV	CGGTTTATCCCCGCTGGCGCGGGGAACTCGATTCTTATACATAAAAGC
zb1b2	TCGAGTTCCCCGCGCCAGCGGGGATAAACCGCTCGTAAAAGCAGTACAGTGCACCGTAAGATCGAGTTCCCCGCGCCAGCGGGGATAAACCGTCGCCTGTCTTTTGATCTGCTAAACGTA ACTCGAGTTCCCCGCGCCAGCGGGGATAAACCGCAGTTTA TAAAATTCTGTCCGGTTGCGCCCTCGAGTTCCCCGCGCCAGCGGGGATAAACCG
b1-FOR	GCCAGCGGGGATAAACCGTCGCCTGTCTTTTGATC	pCASCADE-b1b2
pCASCADE-REV	CTTGCCCGCCTGATGAATGCTCATCCGG
pCASCADE-FOR	CCGGATGAGCATTCATCAGGCGGGCAAG	pCASCADE-z
zwf-REV	CGGTTTATCCCCGCTGGCGCGGGGAACTCGATCTTACGGTGCACTGTAC
g1x	TCGAGTTCCCCGCGCCAGCGGGGATAAACCGAAAAGCATATAATGCGTAAAAGTTATGAAGTTCGAGTTCCCCGCGCCAGCGGGGATAAACCGGGAGTGCCCAATATTACGACATCATCCATCTCGAGTTCCCCGCGCCAGCGGGGATAAACCG
x-FOR	CCAGCGGGGATAAACCGGGAGTGCCCAATATTAC	pCASCADE-x
pCASCADE-REV	CTTGCCCGCCTGATGAATGCTCATCCGG
pCASCADE-FOR	CCGGATGAGCATTCATCAGGCGGGCAAG	pCASCADE-g1
g1-REV	CGGTTTATCCCCGCTGGCGCGGGGAACTCGAACTTCATAACTTTTAC
g1ux	TCGAGTTCCCCGCGCCAGCGGGGATAAACCGAAAAGCATATAATGCGTAAAAGTTATGAAGTTCGAGTTCCCCGCGCCAGCGGGGATAAACCGTTACCATTCTGTTGCTTTTATGTATAAGAATCGAGTTCCCCGCGCCAGCGGGGATAAACCGGGAGTGCCCAATATTACGACATCATCCATCTCGAGTTCCCCGCGCCAGCGGGGATAAACCG
x-FOR	CCAGCGGGGATAAACCGGGAGTGCCCAATATTAC	pCASCADE-x
pCASCADE-REV	CTTGCCCGCCTGATGAATGCTCATCCGG
pCASCADE-FOR	CCGGATGAGCATTCATCAGGCGGGCAAG	pCASCADE-g1u
udhA-REV	CGGTTTATCCCCGCTGGCGCGGGGAACTCGATTCTTATACATAAAAGC
g1zx	TCGAGTTCCCCGCGCCAGCGGGGATAAACCGAAAAGCATATAATGCGTAAAAGTTATGAAGTTCGAGTTCCCCGCGCCAGCGGGGATAAACCGCTCGTAAAAGCAGTACAGTGCACCGTAAGATCGAGTTCCCCGCGCCAGCGGGGATAAACCGGGAGTGCCCAATATTACGACATCATCCATCTCGAGTTCCCCGCGCCAGCGGGGATAAACCG
x-FOR	CCAGCGGGGATAAACCGGGAGTGCCCAATATTAC	pCASCADE-x
pCASCADE-REV	CTTGCCCGCCTGATGAATGCTCATCCGG
pCASCADE-FOR	CCGGATGAGCATTCATCAGGCGGGCAAG	pCASCADE-g1z
zwf-REV	CGGTTTATCCCCGCTGGCGCGGGGAACTCGATCTTACGGTGCACTGTAC
g2x	TCGAGTTCCCCGCGCCAGCGGGGATAAACCGTATTGACCAATTCATTCGGGACAGTTATTAGTTCGAGTTCCCCGCGCCAGCGGGGATAAACCGGGAGTGCCCAATATTACGACATCATCCATCTCGAGTTCCCCGCGCCAGCGGGGATAAACCG
x-FOR	CCAGCGGGGATAAACCGGGAGTGCCCAATATTAC	pCASCADE-x
pCASCADE-REV	CTTGCCCGCCTGATGAATGCTCATCCGG
pCASCADE-FOR	CCGGATGAGCATTCATCAGGCGGGCAAG	pCASCADE-g2
g2-REV	CGGTTTATCCCCGCTGGCGCGGGGAACTCGAACTAATAACTGTC
g2ux	TCGAGTTCCCCGCGCCAGCGGGGATAAACCGTATTGACCAATTCATTCGGGACAGTTATTAGTTCGAGTTCCCCGCGCCAGCGGGGATAAACCGTTACCATTCTGTTGCTTTTATGTATAAGAATCGAGTTCCCCGCGCCAGCGGGGATAAACCGGGAGTGCCCAATATTACGACATCATCCATCTCGAGTTCCCCGCGCCAGCGGGGATAAACCG
x-FOR	CCAGCGGGGATAAACCGGGAGTGCCCAATATTAC	pCASCADE-x
pCASCADE-REV	CTTGCCCGCCTGATGAATGCTCATCCGG
pCASCADE-FOR	CCGGATGAGCATTCATCAGGCGGGCAAG	pCASCADE-g2u
udhA-REV	CGGTTTATCCCCGCTGGCGCGGGGAACTCGATTCTTATACATAAAAGC
g2zx	TCGAGTTCCCCGCGCCAGCGGGGATAAACCGTATTGACCAATTCATTCGGGACAGTTATTAGTTCGAGTTCCCCGCGCCAGCGGGGATAAACCGCTCGTAAAAGCAGTACAGTGCACCGTAAGATCGAGTTCCCCGCGCCAGCGGGGATAAACCGGGAGTGCCCAATATTACGACATCATCCATCTCGAGTTCCCCGCGCCAGCGGGGATAAACCG
x-FOR	CCAGCGGGGATAAACCGGGAGTGCCCAATATTAC	pCASCADE-x
pCASCADE-REV	CTTGCCCGCCTGATGAATGCTCATCCGG
pCASCADE-FOR	CCGGATGAGCATTCATCAGGCGGGCAAG	pCASCADE-g2z
zwf-REV	CGGTTTATCCCCGCTGGCGCGGGGAACTCGATCTTACGGTGCACTGTAC
zx	TCGAGTTCCCCGCGCCAGCGGGGATAAACCGCTCGTAAAAGCAGTACAGTGCACCGTAAGATCGAGTTCCCCGCGCCAGCGGGGATAAACCGGGAGTGCCCAATATTACGACATCATCCATCTCGAGTTCCCCGCGCCAGCGGGGATAAACCG
x-FOR	CCAGCGGGGATAAACCGGGAGTGCCCAATATTAC	pCASCADE-x
pCASCADE-REV	CTTGCCCGCCTGATGAATGCTCATCCGG
pCASCADE-FOR	CCGGATGAGCATTCATCAGGCGGGCAAG	pCASCADE-z
zwf-REV	CGGTTTATCCCCGCTGGCGCGGGGAACTCGATCTTACGGTGCACTGTAC
ux	TCGAGTTCCCCGCGCCAGCGGGGATAAACCGTTACCATTCTGTTGCTTTTATGTATAAGAATCGAGTTCCCCGCGCCAGCGGGGATAAACCGGGAGTGCCCAATATTACGACATCATCCATCTCGAGTTCCCCGCGCCAGCGGGGATAAACCG
x-FOR	CCAGCGGGGATAAACCGGGAGTGCCCAATATTAC	pCASCADE-x
pCASCADE-REV	CTTGCCCGCCTGATGAATGCTCATCCGG
pCASCADE-FOR	CCGGATGAGCATTCATCAGGCGGGCAAG	pCASCADE-u
udhA-REV	CGGTTTATCCCCGCTGGCGCGGGGAACTCGATTCTTATACATAAAAGC
X	TCGAGTTCCCCGCGCCAGCGGGGATAAACCGGGAGTGCCCAATATTACGACATCATCCATCTCGAGTTCCCCGCGCCAGCGGGGATAAACCG
xylA-FOR	CCAGCGGGGATAAACCGGGAGTGCCCAATATTAC	pCASCADE-x
xylA-REV	CTTGCCCGCCTGATGAATGCTCATCCGG

## Sheet: Table S3
Supplementatl Table S3: Plasmid used in this study
Plasmid	Insert	ori	Res	Addgene	Source
pCASCADE-ev	Non guide empty vector control	p15a	Cm	65821	18
pCASCADE-g2	gltAp2 silencing guide	p15a	Cm	65817	18
pCASCADE-f	fabIp silencing guide	p15a	Cm	66635	17
pCASCADE-u	udhAp silencing guide	p15a	Cm	65818	17
pCASCADE-z	zwfp silencing guide	p15a	Cm	65825	18
pCASCADE-g2z	gltA2p, zwfp guide array	p15a	Cm	71338	18
pCASCADE-g2u	gltA2p, udhAp guide array	p15a	Cm	65819	17
pCASCADE-g1	gltAp1 silencing guide	p15a	Cm	71334	50
pCASCADE-uz	udhAp, zwfp guide array	p15a	Cm	87153	This study
pCASCADE-g1z	gltA1p, zwfp guide array	p15a	Cm	71337	This study
pCASCADE-g1u	gltA1p, udhAp guide array	p15a	Cm	71339	This study
pCASCADE-g1g2	gltA1p, gltAp2 guide array	p15a	Cm	71348	50
pCASCADE-g1g2u	gltA1p, gltAp2, udhAp guide array	p15a	Cm	71343	This study
pCASCADE-g1g2z	gltA1p, gltAp2, zwfp guide array	p15a	Cm	71347	This study
pCASCADE-g1g2uz	gltA1p, gltAp2, udhAp, zwfp guide array	p15a	Cm	87152	This study
pCASCADE-fg1	fabIp, gltAp1 guide array	p15a	Cm	71340	This study
pCASCADE-fg2	fabIp, gltAp2 guide array	p15a	Cm	71341	This study
pCASCADE-fu	fabIp, udhAp guide array	p15a	Cm	66636	This study
pCASCADE-fz	fabIp, zwfp guide array	p15a	Cm	71335	This study
pCASCADE-fg1g2	fabIp, gltAp1, gltAp2 guide array	p15a	Cm	71342	This study
pCASCADE-fg1g2z	fabIp, gltAp1, gltAp2, zwfp guide array	p15a	Cm	66636	This study
pCASCADE-fg1g2u	fabIp, gltAp1, gltAp2, udhAp guide array	p15a	Cm	66637	This study
pCASCADE-fg1g2uz	fabIp, gltAp1, gltAp2, udhAp, zwfp guide array	p15a	Cm	87148	This study
pCASCADE-proD	proDp silencing guide (proD-1)	p15a	Cm	65820	18
pCASCADE-proD-2	proDp silencing guide 2 (proD-2)	p15a	Cm	162320	This study
pCASCADE-dfp-1	dfpp silencing guide	p15a	Cm	162321	This study
pCASCADE-dfp-2	dfpp silencing guide	p15a	Cm	162322	This study
pCASCADE-dfp-3	dfpp silencing guide	p15a	Cm	162323	This study
pCASCADE-cysS-1	cysSp silencing guide	p15a	Cm	162324	This study
pCASCADE-cysS-2	cysSp silencing guide	p15a	Cm	162325	This study
pCASCADE-cysS-3	cysSp silencing guide	p15a	Cm	162326	This study
pCASCADE-nadE	nadEp silencing guide	p15a	Cm	162327	This study
pCASCADE-adk	adkp silencing guide	p15a	Cm	162328	This study
pCASCADE-dxs-1	dxsp silencing guide	p15a	Cm	162329	This study
pCASCADE-dxs-2	dxsp silencing guide	p15a	Cm	162330	This study
pCASCADE-gyrA-1	gyrAp silencing guide	p15a	Cm	162331	This study
pCASCADE-gyrA-2	gyrAp silencing guide	p15a	Cm	162332	This study
pCASCADE-x	xylAp silencing guide	p15a	Cm	158611	18
pCASCADE-b1	glnBp silencing guide	p15a	Cm	162390	This study
pCASCADE-b2	glnBp silencing guide	p15a	Cm	162391	This study
pCASCADE-b1b2	glnBp b1,b2 silencing guide array	p15a	Cm	162392	This study
pCASCADE-gapA	gapAp silencing guide	p15a	Cm	162395	This study
pCASCADE-fg1g2ua	fabIp, gltA1p, gltAp2, udhAp, gapAp guide array	p15a	Cm	162393	This study
pCASCADE-fg1g2uaz	fabIp, gltA1p, gltAp2, udhAp, gapAp, zwfp guide array	p15a	Cm	162394	This study
pCASCADE-g1g2a	gltA1p, gltAp2, gapAp, guide array	p15a	Cm	162396	This study
pCASCADE-g1g2b1	gltA1p, gltAp2, glnB-1p guide array	p15a	Cm	162397	This study
pCASCADE-g1g2b1b2	gltA1p, gltAp2, glnBpl ,glnBp2 guide array	p15a	Cm	162398	This study
pCASCADE-g1g2ua	gltA1p, gltAp2, udhAp, gapAp, guide array	p15a	Cm	162399	This study
pCASCADE-g1g2ub1	gltA1p, gltAp2, udhAp, glnBpl guide array	p15a	Cm	162400	This study
pCASCADE-g1g2ub1b2	gltA1p, gltAp2, udhAp, glnBpl, glnBp2 guide array	p15a	Cm	162401	This study
pCASCADE-g1g2ux	gltA1p, gltAp2, udhAp, xylAp guide array	p15a	Cm	162402	This study
pCASCADE-g1g2uza	gltA1p, gltAp2, udhAp, gapAp, zwfp guide array	p15a	Cm	162403	This study
pCASCADE-g1g2x	gltA1p, gltAp2, xylAp guide array	p15a	Cm	162404	This study
pCASCADE-g1g2zb1b2	gltA1p, gltAp2, zwfp, glnBpl, glnBp2 guide array	p15a	Cm	162405	This study
pCASCADE-g1g2zx	gltA1p, gltAp2, zwfp, xylAp guide array	p15a	Cm	162406	This study
pCASCADE-g1b1b2	gltA1p, glnBpl, glnBp2 guide array	p15a	Cm	162407	This study
pCASCADE-g1ub1	gltA1p, udhAp, glnBp1 guide array	p15a	Cm	162408	This study
pCASCADE-g1ub1b2	gltA1p, udhAp, glnBp1 , glnBp2 guide array	p15a	Cm	162409	This study
pCASCADE-g1ux	gltA1p, udhAp, xylAp guide array	p15a	Cm	162410	This study
pCASCADE-g1x	gltA1p, xylAp guide array	p15a	Cm	162411	This study
pCASCADE-g1zb1b2	gltA1p, zwfp, glnBpl, glnBp2 guide array	p15a	Cm	162412	This study
pCASCADE-g1zx	gltA1p, zwfp, xylAp guide array	p15a	Cm	162413	This study
pCASCADE-g2b1b2	gltA2p, glnBpl, glnBp2 guide array	p15a	Cm	162414	This study
pCASCADE-g2ub1	gltA2p, udhAp, glnBpl guide array	p15a	Cm	162415	This study
pCASCADE-g2ub1b2	gltA2p, udhAp, glnBpl , glnBp2 guide array	p15a	Cm	162416	This study
pCASCADE-g2ux	gltA2p, udhAp, xylAp guide array	p15a	Cm	162417	18
pCASCADE-g2x	gltA2p, xylAp guide array	p15a	Cm	158613	18
pCASCADE-g2zb1b2	gltAp2, zwfp, glnBpl, glnBp2 guide array	p15a	Cm	162418	This study
pCASCADE-g2zx	gltA2p, zwfp, xylAp guide array	p15a	Cm	162424	18
pCASCADE-g1b1	gltAp1, glnBpl guide array	p15a	Cm	162419	This study
pCASCADE-g2b1	gltAp2, glnBpl guide array	p15a	Cm	162420	This study
pCASCADE-ub1	udhAp, glnBpl guide array	p15a	Cm	162421	This study
pCASCADE-ub1b2	udhAp, glnBpl, glnBp2 guide array	p15a	Cm	162422	This study
pCASCADE-ux	udhAp, xylAp guide array	p15a	Cm	158612	18
pCASCADE-zb1b2	zwfp, glnBpl, glnBp2 guide array	p15a	Cm	162423	This study
pCASCADE-zx	zwfp, xylAp guide array	p15a	Cm	158614	18
pFABI	EM7p-fabI	colE1	Kan	138659	This study

## Sheet: Table S4
Supplemental Table S4: Strains used in this study
Strain	Genotype	Source
E. cloni 10G	F- mcrA Δ(mrr-hsdRMS-mcrBC) endA1 recA1 Φ80dlacZΔM15 ΔlacX74 araD139 Δ(ara,leu)7697galU galK rpsL nupG λ- tonA (StrR)	Lucigen
DLF_R002	F-, λ-, Δ​(araD-araB)567, lacZ4787(del)(::rrnB-3) , rph-1, Δ(rhaD-rhaB)568, hsdR51, ΔackA-pta, ΔpoxB, ΔpflB, ΔldhA, ΔadhE, ΔiclR, ΔarcA	8
DLF_Z0025	F-, λ-, Δ(araD-araB)567, lacZ4787(del)(::rrnB-3) , rph-1, Δ(rhaD-rhaB)568, hsdR514, ΔackA-pta, ΔpoxB, ΔpflB, ΔldhA, ΔadhE, ΔiclR, ΔarcA, ΔsspB::frt, Δcas3:: ugpBp-sspB-J23100p-casA	13
DLF_Z0045	DLF_Z0025, gltA-DAS4::zeoR, udhA-DAS4::bsdR	17
DLF_Z0047	DLF_Z0045, fabI-DAS4::gentR	17
DLF_Z0047, recA1	DLF_Z0047, recA1::ampR	This study
DLF_Z0047, ΔsbcD	DLF_Z0047, ΔsbcD::ampR	This study
DLF_Z0047, Δcas1	DLF_Z0047, Δcas1::purR	This study
DLF_Z0047, Δcas2	DLF_Z0047, Δcas2::purR	This study
DLF_S0025	F-, λ-, Δ(araD-araB)567, lacZ4787(del)(::rrnB-3) , rph-1, Δ(rhaD-rhaB)568, hsdR514, ΔackA-pta, ΔpoxB, ΔpflB, ΔldhA, ΔadhE, ΔiclR, ΔarcA, ΔsspB::frt, Δcas3:: ugpBp-sspB-yibDp-casA	This study
DLF_S0047	DLF_S0025, fabI-DAS4::gentR, gltA-DAS4::zeoR, udhA-DAS4::bsdR	This study
Res - resistance marker, Cm- chloramphenicol, bsd - blasticidin, zeo- zeocin, gent - gentamicin, ampR- ampicillin, purR - puromycin.

## Sheet: Table S5
Supplemental Table S5: Synthetic DNA sequences used in this study
tetA-sacB Cassette
TCCTAATTTTTGTTGACACTCTATCATTGATAGAGTTATTTTACCACTCCCTATCAGTGATAGAGAAAAGTGAAATGAATAGTTCGACAAAGATCGCATTGGTAATTACGTTACTCGATGCCATGGGGATTGGCCTTATCATGCCAGTCTTGCCAACGTTATTACGTGAATTTATTGCTTCGGAAGATATCGCTAACCACTTTGGCGTATTGCTTGCACTTTATGCGTTAATGCAGGTTATCTTTGCTCCTTGGCTTGGAAAAATGTCTGACCGATTTGGTCGGCGCCCAGTGCTGTTGTTGTCATTAATAGGCGCATCGCTGGATTACTTATTGCTGGCTTTTTCAAGTGCGCTTTGGATGCTGTATTTAGGCCGTTTGCTTTCAGGGATCACAGGAG…
recA1::ampR
CCATCTCTACCGGTTCGCTTTCACTGGATATCGCGCTTGGGGCAGGTGGTCTGCCGATGGGCCGTATCGTCGAAATCTACGGACCGGAATCTTCCGGTAAAACCACGCTGACGCTGCAGGTGATCGCCGCAGCGCAGCGTGAAGGTAAAACCTGTGCGTTTATCGATGCTGAACACGCGCTGGACCCAATCTACGCACGTAAACTGGGCGTCGATATCGACAACCTGCTGTGCTCCCAGCCGGACACCGGCGAGCAGGCACTGGAAATCTGTGACGCCCTGGCGCGTTCTGGCGCAGTAGACGTTATCGTCGTTGACTCCGTGGCGGCACTGACGCCGAAAGCGGAAATCGAAGGCGAAATCGATGACTCTCACATGGGCCTTGCGGCACGTATGATGA…
ΔsbcD::ampR
TGATTGCAGTCCAGTTACGCTGGAGTCTGAGGCTCGTCCTGAATGATATCAAGCTTGAATTCGTTGGTTCATCCCGTGGGCATTGCATAGGGATAACAGGGTAATCTAAATACATTCAAATATCTATCCGCTCATGAGACAATAACCCTGATAAATGCTTCAATAATATTGAAAAAGGAAGAATATGAGTATTCAACATTTCCGTGTCGCCCTTATTCCCTTTTTTGCGGCATTTTGCCTTCCTGTTTTTGCTCACCCAGAAACGCTGGTGAAAGTAAAAGATGCCGAAGATCAGTTGGGTGCACGTGTGGGTTACATCGAACTGGACCTCAACAGCGGTAAGATTCTTGAGAGTTTTCGCCCCGAAGAACGTTTCCCAATGATGAGCACTTTTAAAGT…
del_sbcD_p1
gatttccgtggcgcagaaaaaagcaaatggcacatctgtttgggtataatcgcgcccatgctttttcgccaTGATTGCAGTCCAGTTACG
del_sbcD_p2
gggtgaaatcaatcttccattcgccttttaatgagttcaggtttttcaggcgcaggctgagaattATGCCTGGTTATTACCAATGCTTAA
Δcas1::purR
GATCATTTCACGAATTTTTGCGGATACATCACCTACATATACCCCTGCACGTACCTCCAACAACCAGATGGCTAATCTGCCTCGTAAGCGCGGAGGTACATTTTCAGTGACCACGACCAACATACTCATTTCCTGACGGATGGCCTTTTTGCGTTTCTACAAACTCTTTTTGTTTATTTTTCTAAATACATTCAAATATGTATCCGCTCATGAGACAATAACCCTGATAAATGCTTCAATAATATTGAAAAAGGAAGAGTATGACTGAATACAAGCCCACGGTACGCTTGGCGACGCGCGACGATGTTCCCCGCGCTGTTCGTACATTAGCTGCGGCCTTTGCAGATTACCCAGCGACGCGCCATACGGTCGATCCGGACCGCCATATCGAGCGTGTCA…
Δcas2::purR
GCGGTTTATCCCCGCTGGCGCGGGGAACTCTCTAAAAGTATACATTTGTTCTTAAAGCATTTTTTCCCATAAAAACAACCCACCAACCTTAATGTAACATTTCCTTATTATTAAAGATCAGCTAATTCTTTGTTTTCCTGACGGATGGCCTTTTTGCGTTTCTACAAACTCTTTTTGTTTATTTTTCTAAATACATTCAAATATGTATCCGCTCATGAGACAATAACCCTGATAAATGCTTCAATAATATTGAAAAAGGAAGAGTATGACTGAATACAAGCCCACGGTACGCTTGGCGACGCGCGACGATGTTCCCCGCGCTGTTCGTACATTAGCTGCGGCCTTTGCAGATTACCCAGCGACGCGCCATACGGTCGATCCGGACCGCCATATCGAGCG…
Δcas3::Term-ugpBp-sspB-TZ yibDp-casA
TATGAGCAGCATCGAAAAATAGCCCGCTGATATCATCGATAATACTAAAAAAACAGGGAGGCTATTACCAGGCATCAAATAAAACGAAAGGCTCAGTCGAAAGACTGGGCCTTTCGTTTTATCTGTTGTTTGTCGGTGAACGCTCTCTACTAGAGTCACACTGGCTCACCTTCGGGTGGGCCTTTCTGCGTTTATATCTTTCTGACACCTTACTATCTTACAAATGTAACAAAAAAGTTATTTTTCTGTAATTCGAGCATGTCATGTTACCCCGCGAGCATAAAACGCGTGTGTAGGAGGATAATCTATGGATTTGTCACAGCTAACACCACGTCGTCCCTATCTGCTGCGTGCATTCTATGAGTGGTTGCTGGATAACCAGCTCACGCCGCACCTGGT…
pFABI
GGACCGTGTTGACAATTAATCATCGGCATAGTATATCGGCATAGTATAATACGACAAGGTGAGGAACTAAACCATGGGTTTTCTTTCCGGTAAGCGCATTCTGGTAACCGGTGTTGCCAGCAAACTATCCATCGCCTACGGTATCGCTCAGGCGATGCACCGCGAAGGAGCTGAACTGGCATTCACCTACCAGAACGACAAACTGAAAGGCCGCGTAGAAGAATTTGCCGCTCAATTGGGTTCTGACATCGTTCTGCAGTGCGATGTTGCAGAAGATGCCAGCATCGACACCATGTTCGCTGAACTGGGGAAAGTTTGGCCGAAATTTGACGGTTTCGTACACTCTATTGGTTTTGCACCTGGCGATCAGCTGGATGGTGACTATGTTAACGCCGTTAC…
